# Supplementary material
Source: PubMed Central journal article supplement (PMC2659175)
Supplement: supp_284_13_8209__1.pdf [file supp_284_13_8209__1.pdf]

## Luke A. J. O'Neill

---

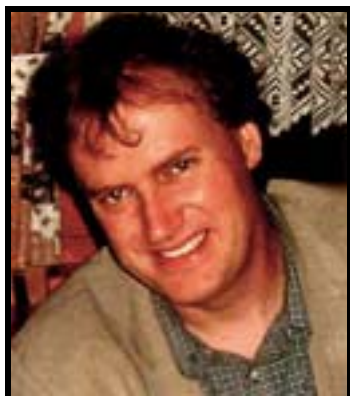

**Current Position:** Chair of Biochemistry at Trinity College Dublin in Ireland

**Education:** Ph.D. in Pharmacology (1988) from University of London

**Non-scientific Interests:** Music (I busked my way through my Ph.D.) and motor boats

I obtained a degree in Natural Sciences (Biochemistry) from Trinity College Dublin in 1985. Then I obtained a Ph.D. in Pharmacology at the University of London in 1988. I was an MRC postdoctoral fellow at the Strangeways Research Laboratory in Cambridge until 1991 when I returned to Trinity College Dublin where I was appointed Lecturer in Biochemistry. I became a fellow at Trinity in 1996. In 2000, I was appointed Director of the Biotechnology Institute. In 2002, I was appointed Science Foundation Ireland Research Professor, and I currently hold the Chair of Biochemistry at Trinity College Dublin, where I was also Head of the School of Biochemistry and Immunology from 2004-2008. In 1996, I was awarded the Royal Irish Academy's medal for Biochemistry. In 2005, I was elected a member of EMBO. I am a co-founder and director of Opsona Therapeutics. My research is in the area of the molecular basis of inflammatory diseases, with a particular interest in pro-inflammatory cytokines and Toll-like receptors. I have published over 150 research papers and am on the editorial boards of six journals, including Associate Editor of the Journal of Biological Chemistry.

---

**Read Dr. O'Neill's article entitled:** Regulation of Signaling by Non-degradative Ubiquitination

<http://www.jbc.org/cgi/content/full/284/13/8209>
